# Supplementary material
Source: Springer Nature journal article supplement (https://www.springermedizin.de/resource/supplementary/12998_2006_74_MOESM1_ESM.pdf/9623534)

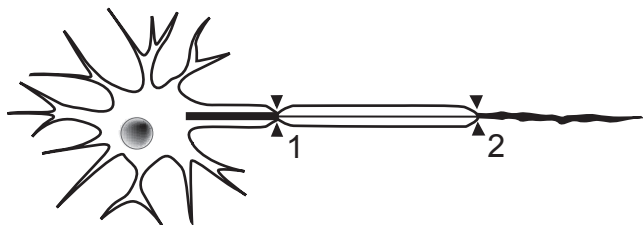

**A**

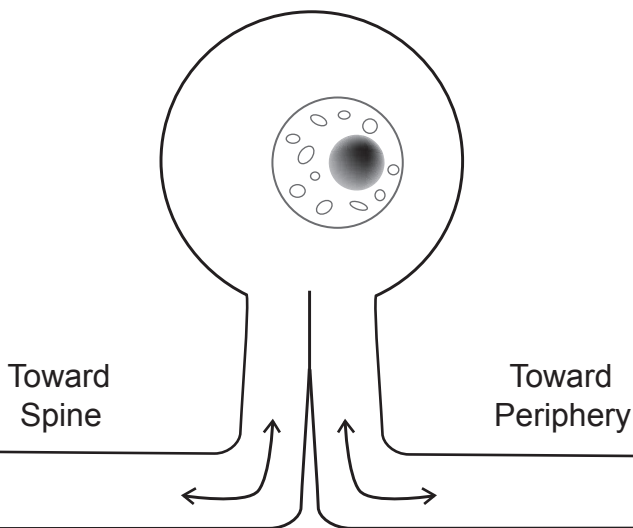

**B**

Supplement: MOESM1 [file 9623534]
